# Supplementary material
Source: PubMed Central journal article supplement (PMC5653143)
Supplement: Supp_Fig2.pdf [file Supp_Fig2.pdf]

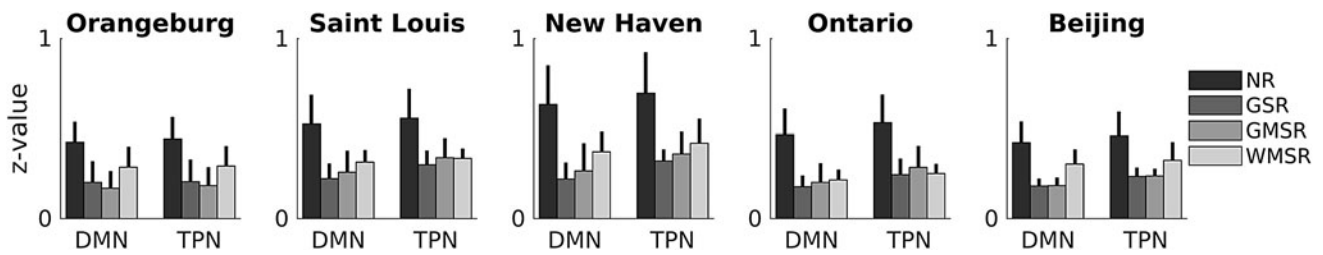

**SUPPLEMENTARY FIG. S2.** Change in voxels' correlation with their own network after regression and bandpass filtering (0.01–0.08 Hz). Pearson correlations (expressed in  $z$  value) of voxels in the DMN and the TPN with their respective averaged network signal are shown. Data are shown for the NR and for the signals after GSR, after GMSR, and after WMSR. Error bars represent standard deviation across subjects. Any regression reduces correlations by approximately a factor of 2. Small statistically significant differences exist (DMN: NR>WMSR>GMSR>GSR; TPN: NR>WMSR>GMSR>GSR). TPN, task-positive network.
