# Supplementary material
Source: PubMed Central journal article supplement (PMC5653143)
Supplement: Supp_Fig3.pdf [file Supp_Fig3.pdf]

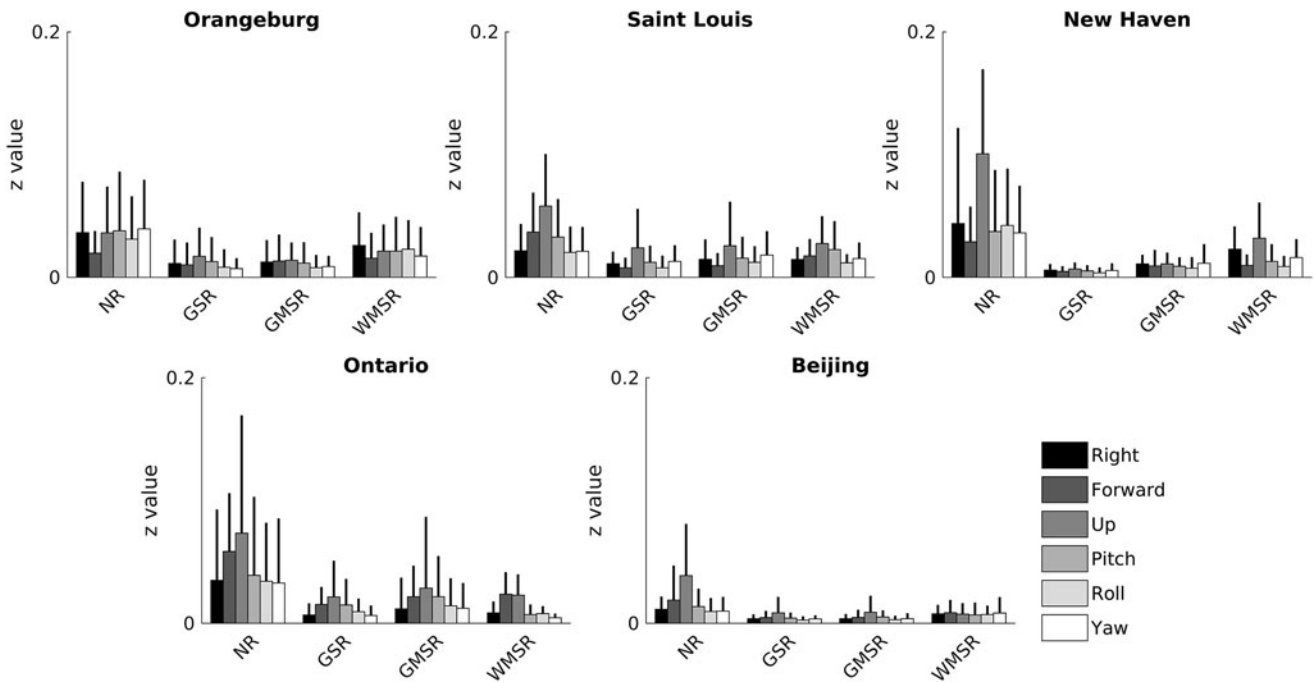

**SUPPLEMENTARY FIG. S3.** Regressions followed by a bandpass filter (0.01–0.08 Hz) correct for motion artifacts. Absolute Pearson correlations (expressed in  $z$  value) of all voxels' time-series with rigid body motion parameters were averaged across subjects. Error bars represent standard deviations across subjects. Correlations between motion parameters and voxels' time series in the NR data are consistently larger than those after GSR, after GMSR, and after WMSR. Statistically significant differences between regressions exist ( $NR > GMSR = WMSR > GSR$ ), shown in Supplementary Table S1C, but are small compared with the difference between no regression and any other regression, indicating that for the purpose of motion correction, these regressions produce comparable results.
