# Supplementary material
Source: PubMed Central journal article supplement (PMC5653143)
Supplement: Supp_Table1.pdf [file Supp_Table1.pdf]

SUPPLEMENTARY TABLE S1. EFFECT OF SIGNAL REGRESSION AND FILTERING ON (A) AND (B) INTRANETWORK CORRELATION IN THE DEFAULT MODE NETWORK AND THE TASK-POSITIVE NETWORK AND (C) CORRELATION WITH MOTION PARAMETERS

| A                           |     |         |      |      | B                            |     |         |      |      |
|-----------------------------|-----|---------|------|------|------------------------------|-----|---------|------|------|
| <i>Default mode network</i> |     |         |      |      | <i>Task-positive network</i> |     |         |      |      |
|                             | NR  | GSR     | GMSR | WMSR |                              | NR  | GSR     | GMSR | WMSR |
| NR                          | █   | 246%    | 229% | 166% | NR                           | █   | 206%    | 191% | 165% |
| GSR                         | ≈0* | █       | 93%  | 67%  | GSR                          | ≈0* | █       | 93%  | 80%  |
| GMSR                        | ≈0* | 0.0061* | █    | 72%  | GMSR                         | ≈0* | 0.0007* | █    | 87%  |
| WMSR                        | ≈0* | ≈0*     | ≈0*  | █    | WMSR                         | ≈0* | ≈0*     | ≈0*  | █    |

  

| C                        |     |         |         |      |
|--------------------------|-----|---------|---------|------|
| <i>Motion correction</i> |     |         |         |      |
|                          | NR  | GSR     | GMSR    | WMSR |
| NR                       | █   | 381%    | 291%    | 231% |
| GSR                      | ≈0* | █       | 76%     | 61%  |
| GMSR                     | ≈0* | 0.0009* | █       | 79%  |
| WMSR                     | ≈0* | 0.0001* | 0.0047* | █    |

(A-B) The lower triangular half shows the lowest  $p$  value of the one-tailed two-sample  $t$ -tests between regressions. The upper triangular half shows the percentage difference between the  $z$  valued intranetwork correlations of all voxels within the network with the network's averaged signal.  $z$  Values were averaged over subjects within site first and then across sites. (C) The lower triangular half shows the lowest  $p$  value of the one-tailed two-sample  $t$ -tests between motion parameters and all voxels' signals. The upper triangular half shows the percentage difference between the  $z$  valued correlations between motion parameters and all voxels' signals. Percentages in all tables are expressed as row variable divided by column variable. The differences between the raw correlations and any of the regressed correlations are far larger than any other difference. Asterisks denote significant  $p$  values after multiple comparison correction. "≈0" indicates smaller than resolvable by *MATLAB*.

GMSR, gray matter signal regression; GSR, global signal regression; NR, nonregressed; WMSR, white matter signal regression.
